# Supplementary material for: Overcharge for Reviving Failed Li-O2 Batteries
Source: Research Square preprint supplement (doi:10.21203/rs.3.rs-823894/v1), 2021-08-31
Supplement: Supplementary file 2 [file 3306291b33f8020dfa43238f.docx]

Supplementary Information

**Overcharge for Reviving Failed Li-O2 Batteries**

Kai Chen,1,2 Dong-Yue Yang,1,2 Jin Wang,1 Gang Huang,1 Xin-Bo Zhang1,2,*

1State Key Laboratory of Rare Earth Resource Utilization, Changchun Institute of Applied Chemistry, Chinese Academy of Sciences, Changchun 130022, China

2University of Science and Technology of China, Hefei 230026, China


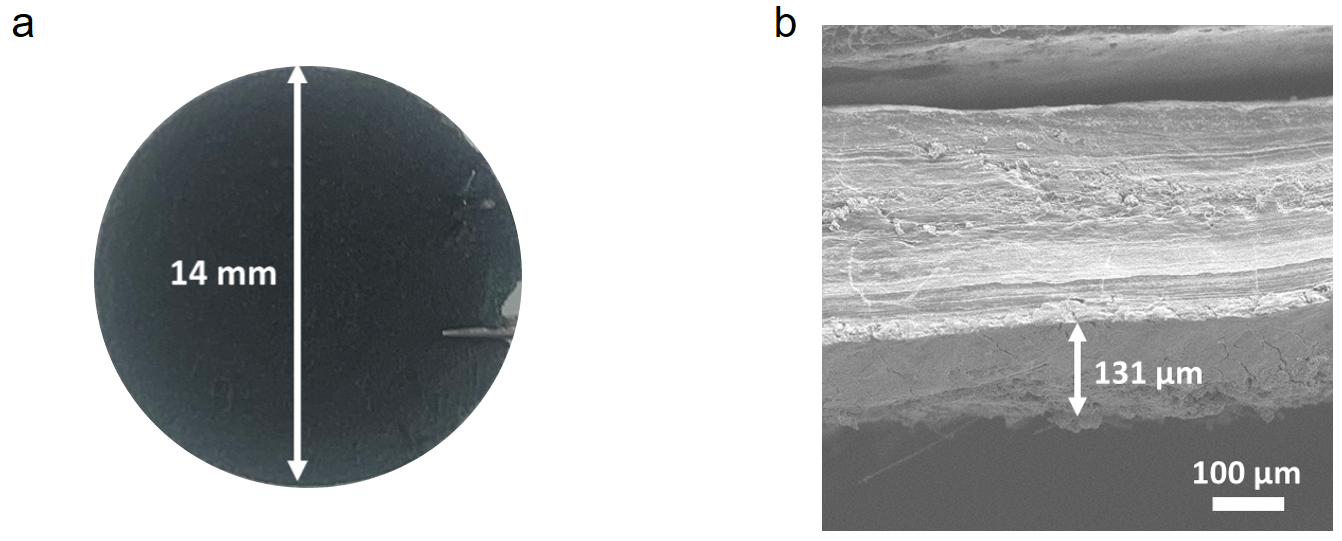


**Supplementary Figure 1.** (a) Optical picture and (b) cross-section image of the Li anode after initial battery failure.


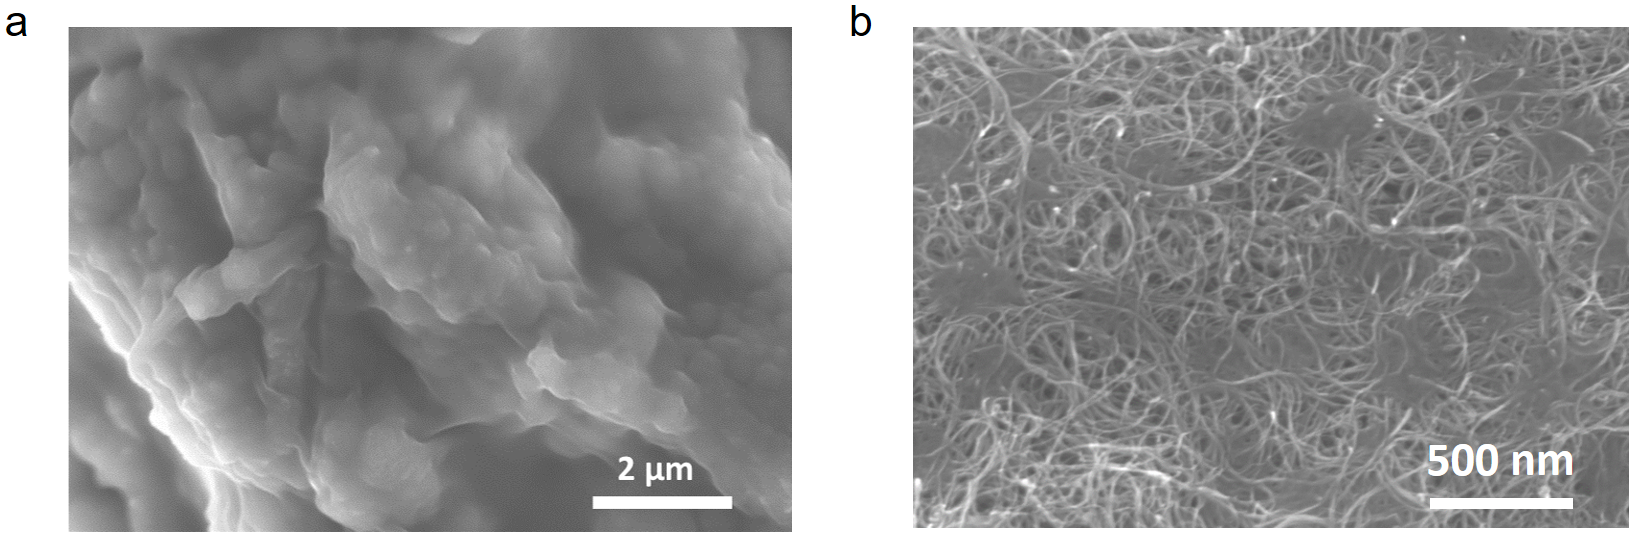


**Supplementary Figure 2.** SEM images of (a) CNT cathode disassembled from the failed Li-O2 battery and (b) pristine CNT cathode.


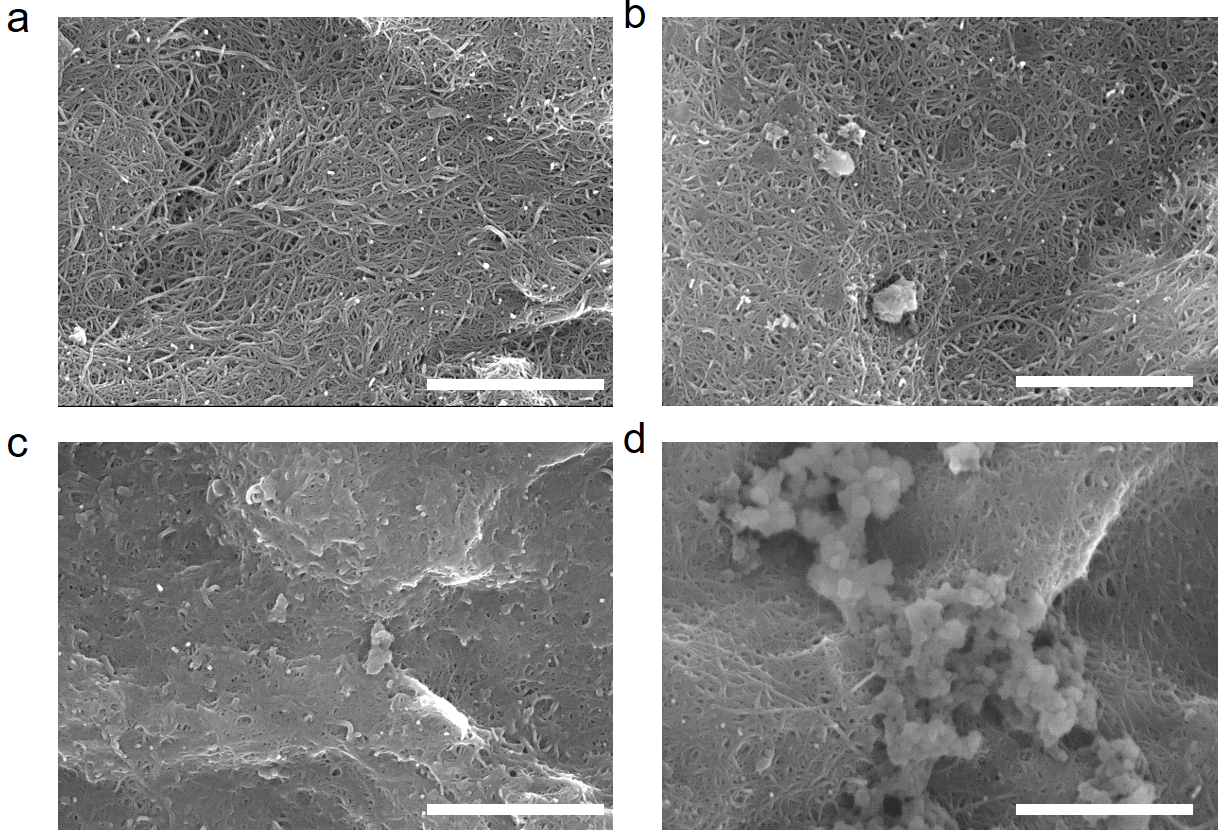


**Supplementary Figure 3.** The morphologies of cathodes after discharge and charge at a fixed capacity of (a) 0.1, (b) 0.2, (c) 0.4, and (d) 0.8 mAh. Scale bar: 2 µm.


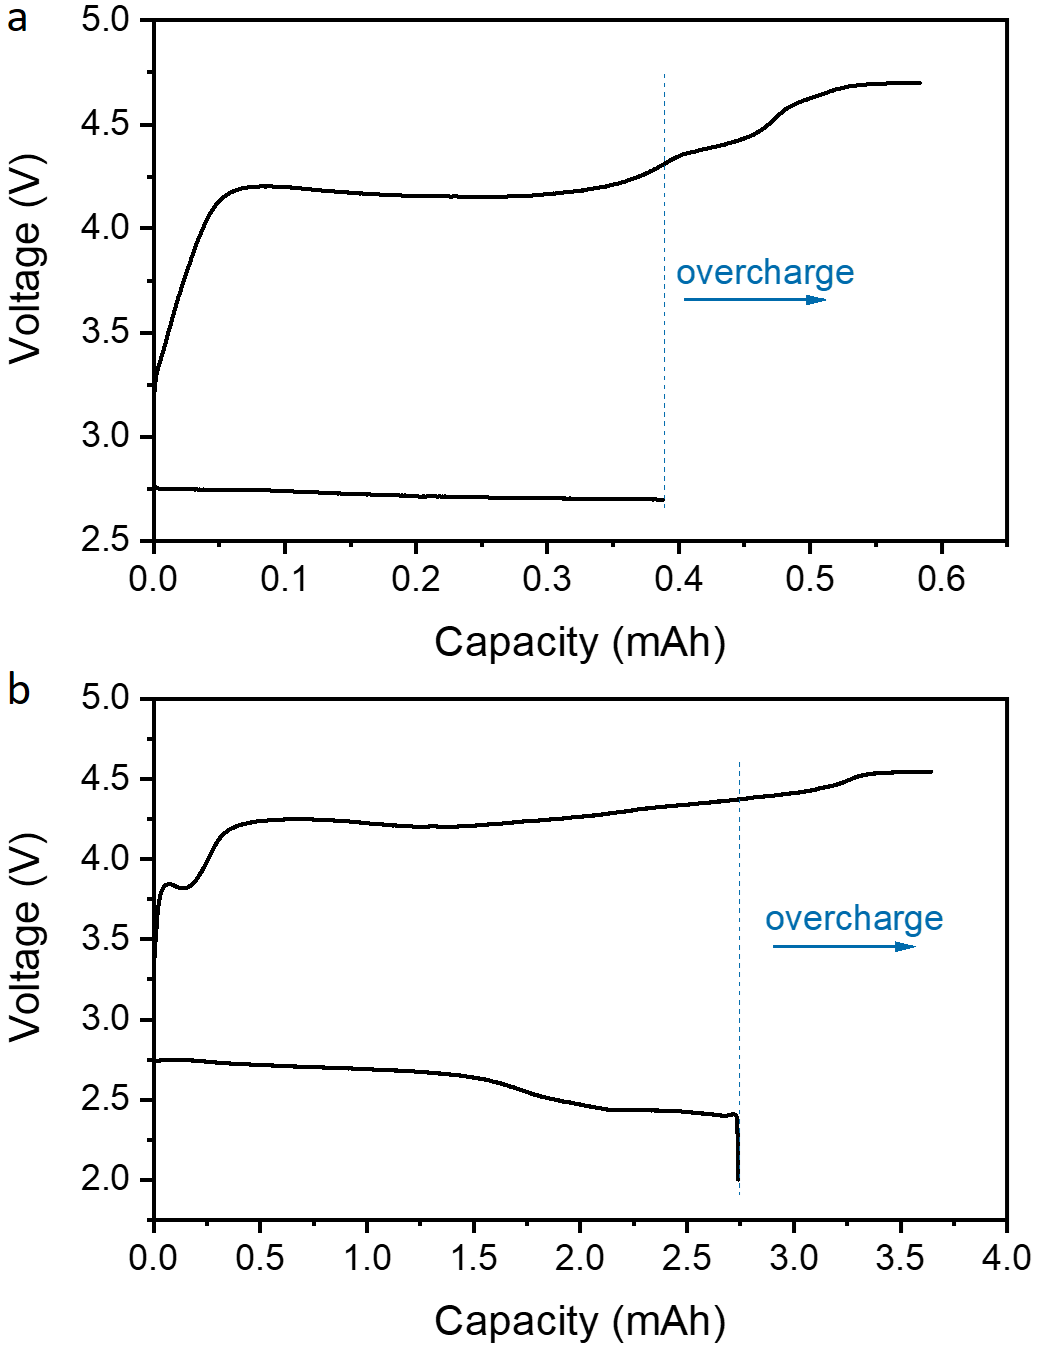


**Supplementary Figure 4.** Overcharge curves after (a) light discharge and (b) deep discharge of Li-O2 batteries at 50 µA.

**Supplementary Figure 5.** FTIR spectra of cathodes after 10th discharge, 10th charge, 50th discharge, and 50th charge.


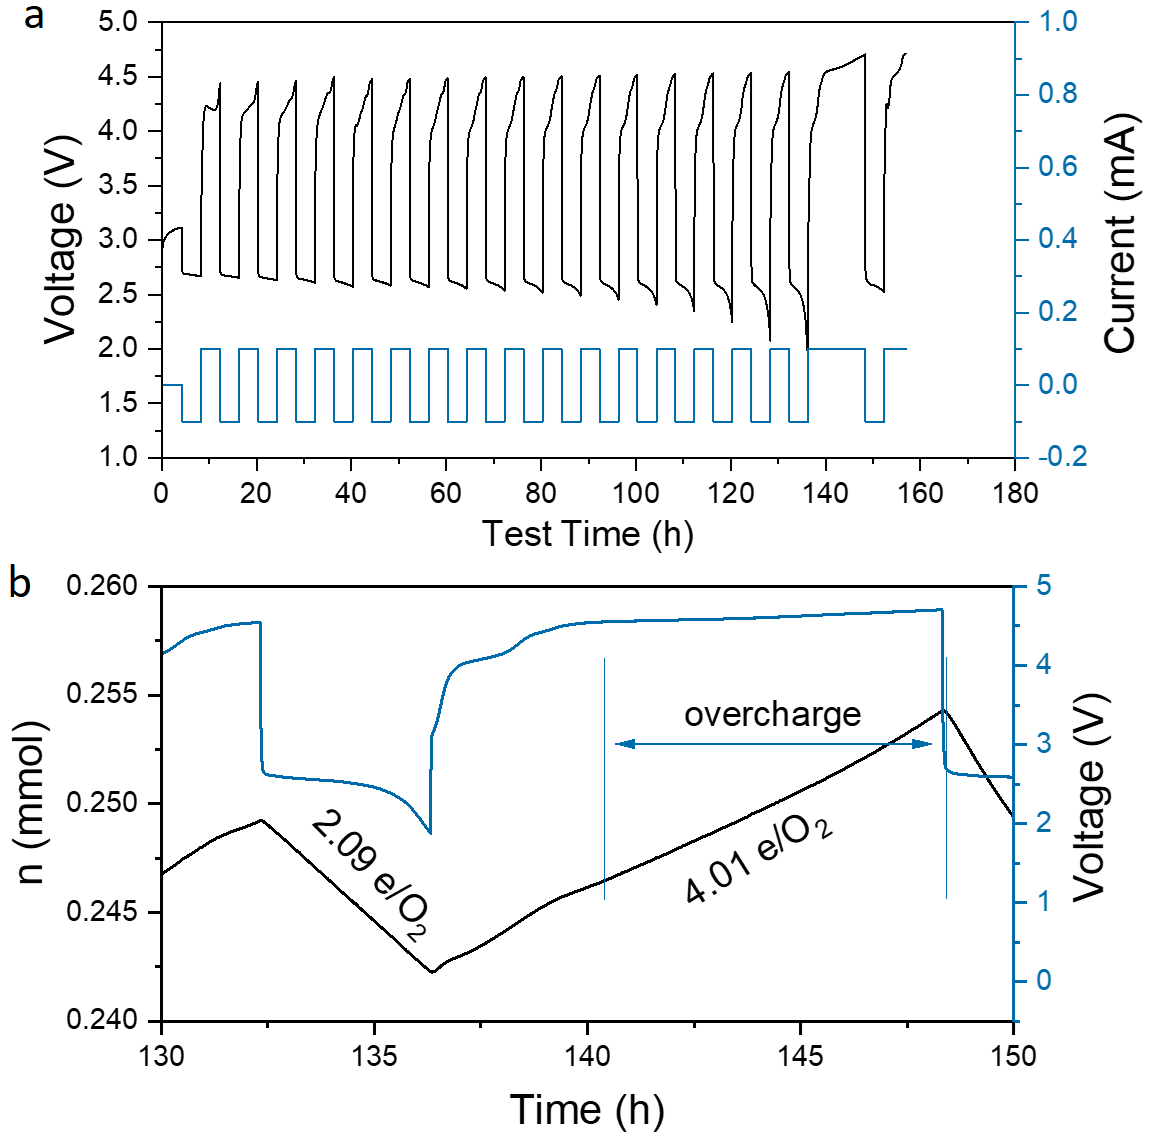


**Supplementary Figure 6.** (a) Overcharge of Li-O2 battery after cycling at 0.1 mA and a fixed capacity of 0.4 mAh. (b) Pressure test of the Li-O2 battery during overcharge.


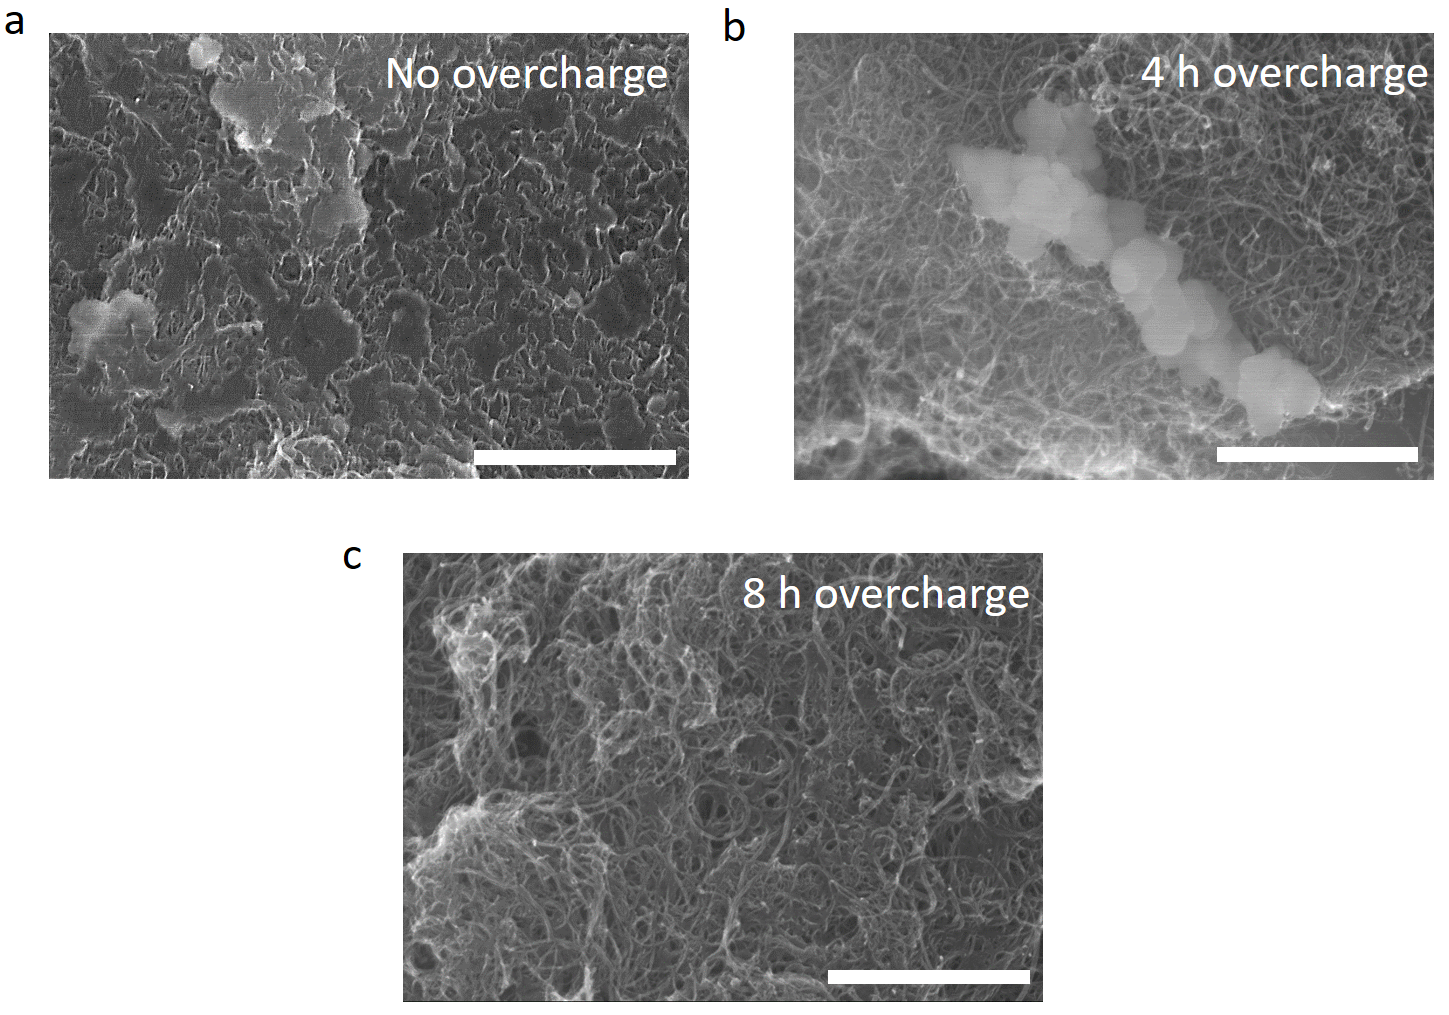


**Supplementary Figure 7.** SEM images of cathodes after cycling of Li-O2 battery for 15 cycles without overcharge (a) and overcharged for 4 h (b) and 8 h (c). Scale bar: 2 µm

**Supplementary Figure 8.** Electrochemical impedance spectroscopy (EIS) of Li-O2 batteries after discharge 15 cycles, then charge 2 h, 4 h, 8 h.


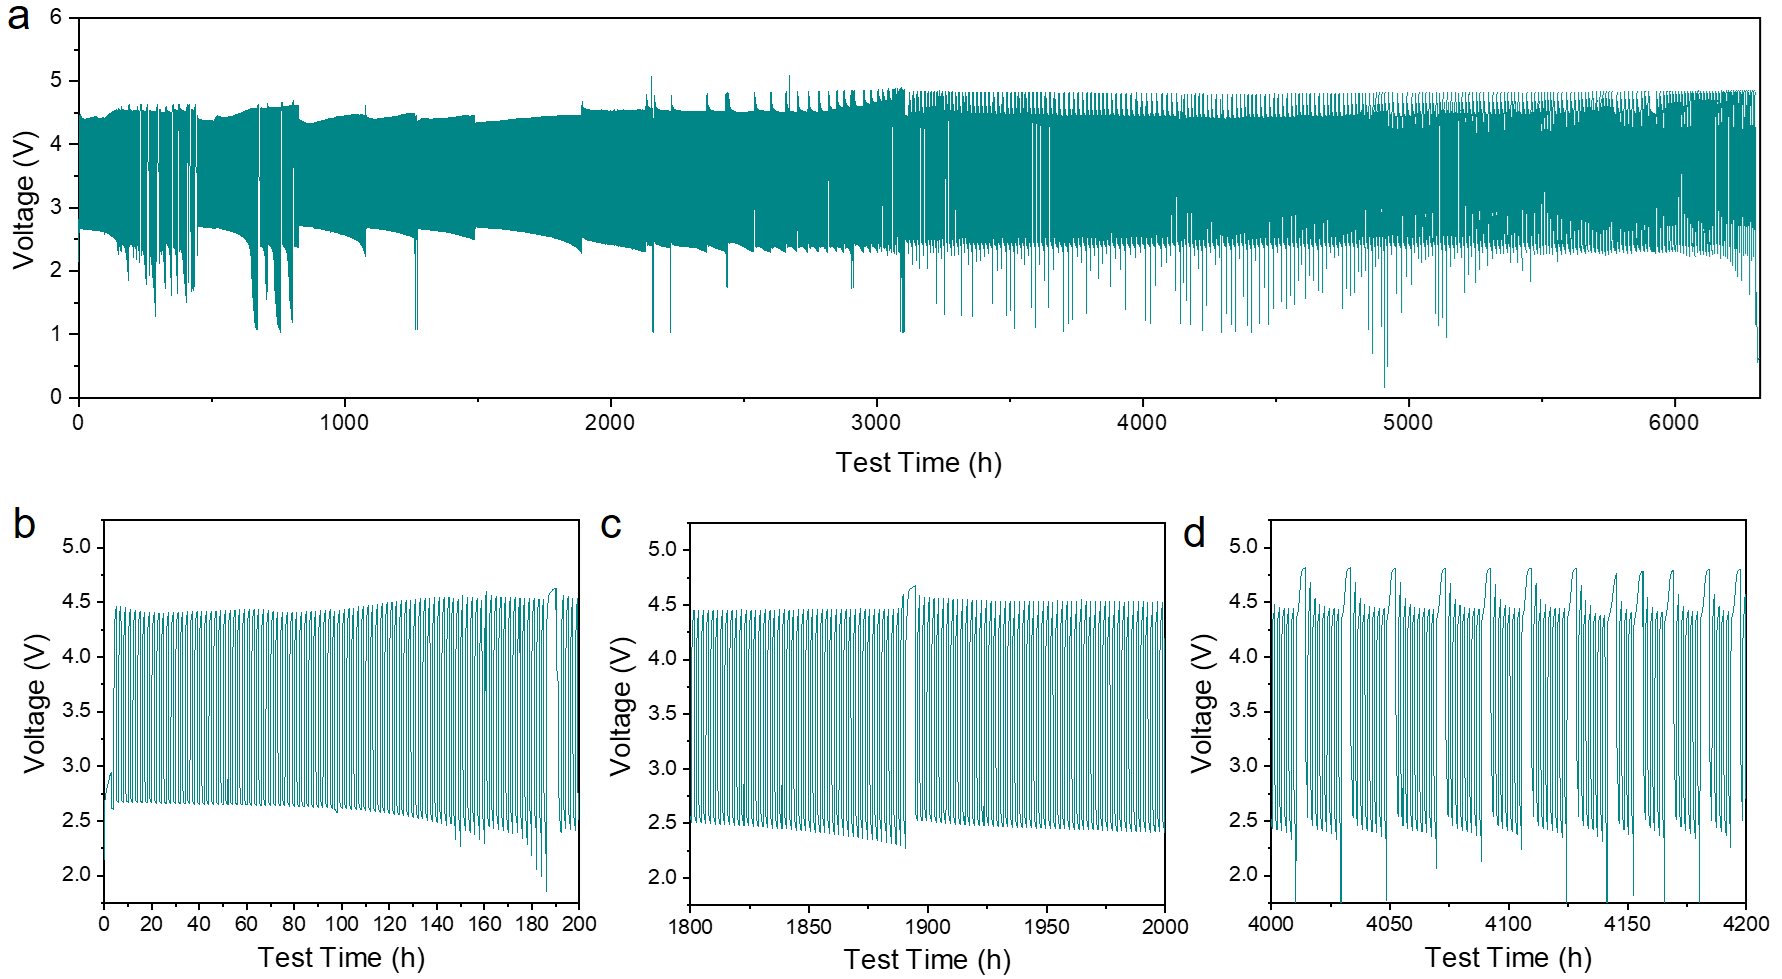


**Supplementary Figure 9.** (a) Cycling performance of a Li-O2/CO2 battery revived with overcharge (2714 cycles). (b-d) The enlargements of the profile in (a). The current density is 500 mA/g and the capacity limitation is 500 mAh/g.


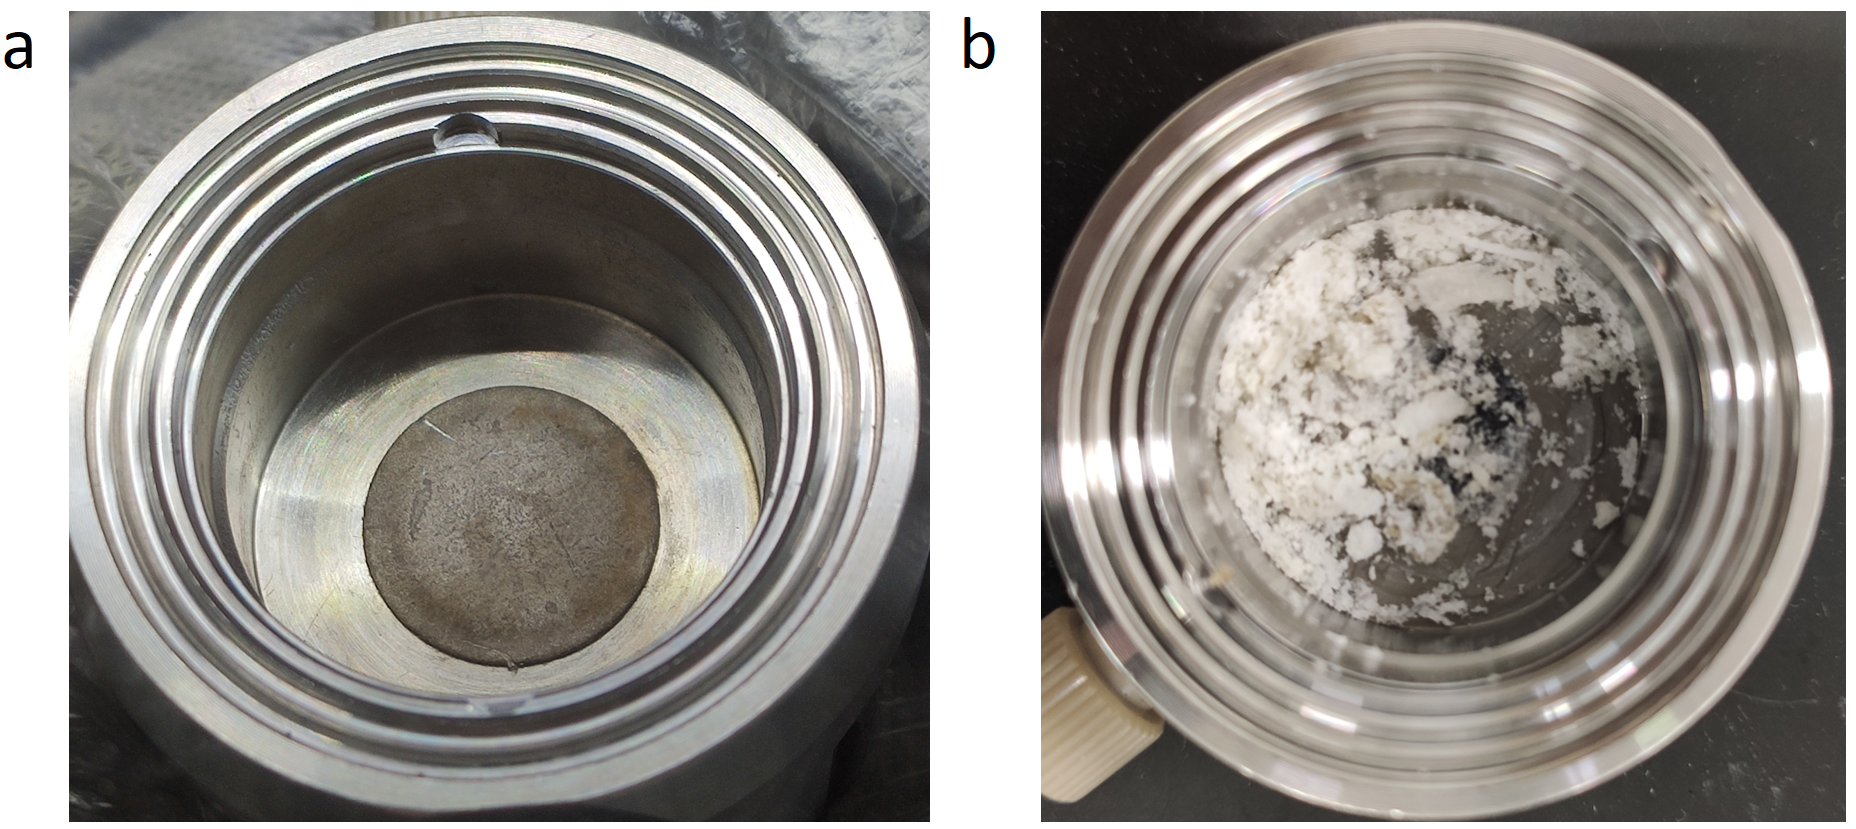


**Supplementary Figure 10.** Li anodes after cycling in Li-O2/CO2 battery for 626 cycles (a) and after battery failure (b).


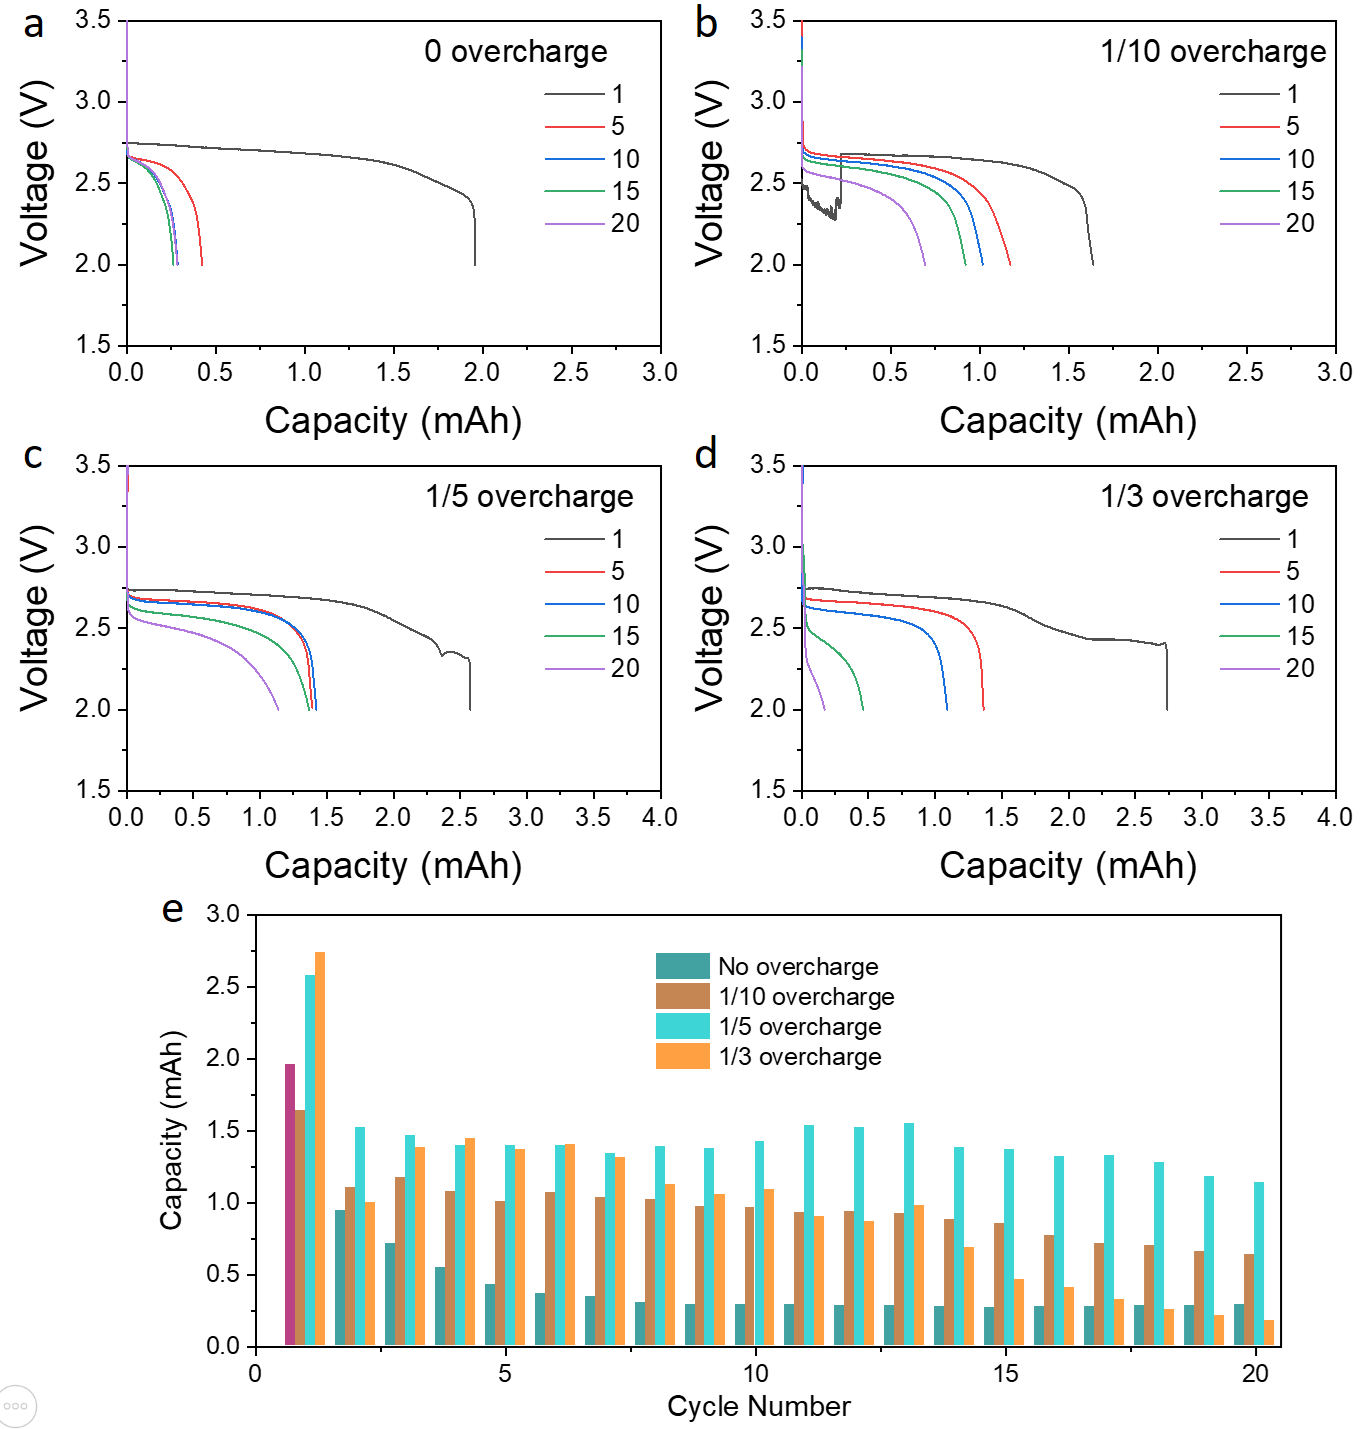


**Supplementary Figure 11.** (a-d) Discharge curves and (e) discharge capacities of Li-O2 batteries in the first 20 cycles with different overcharge ratios. The current density is 200 mA/g.

**Supplementary Figure 12.** Cycling performance of a Li-O2 battery at 200 mA/g and 2000 mAh/g with 50 mM LiI in the electrolyte. Overcharge capacity is 6000 mAh/g at 200 mA/g.


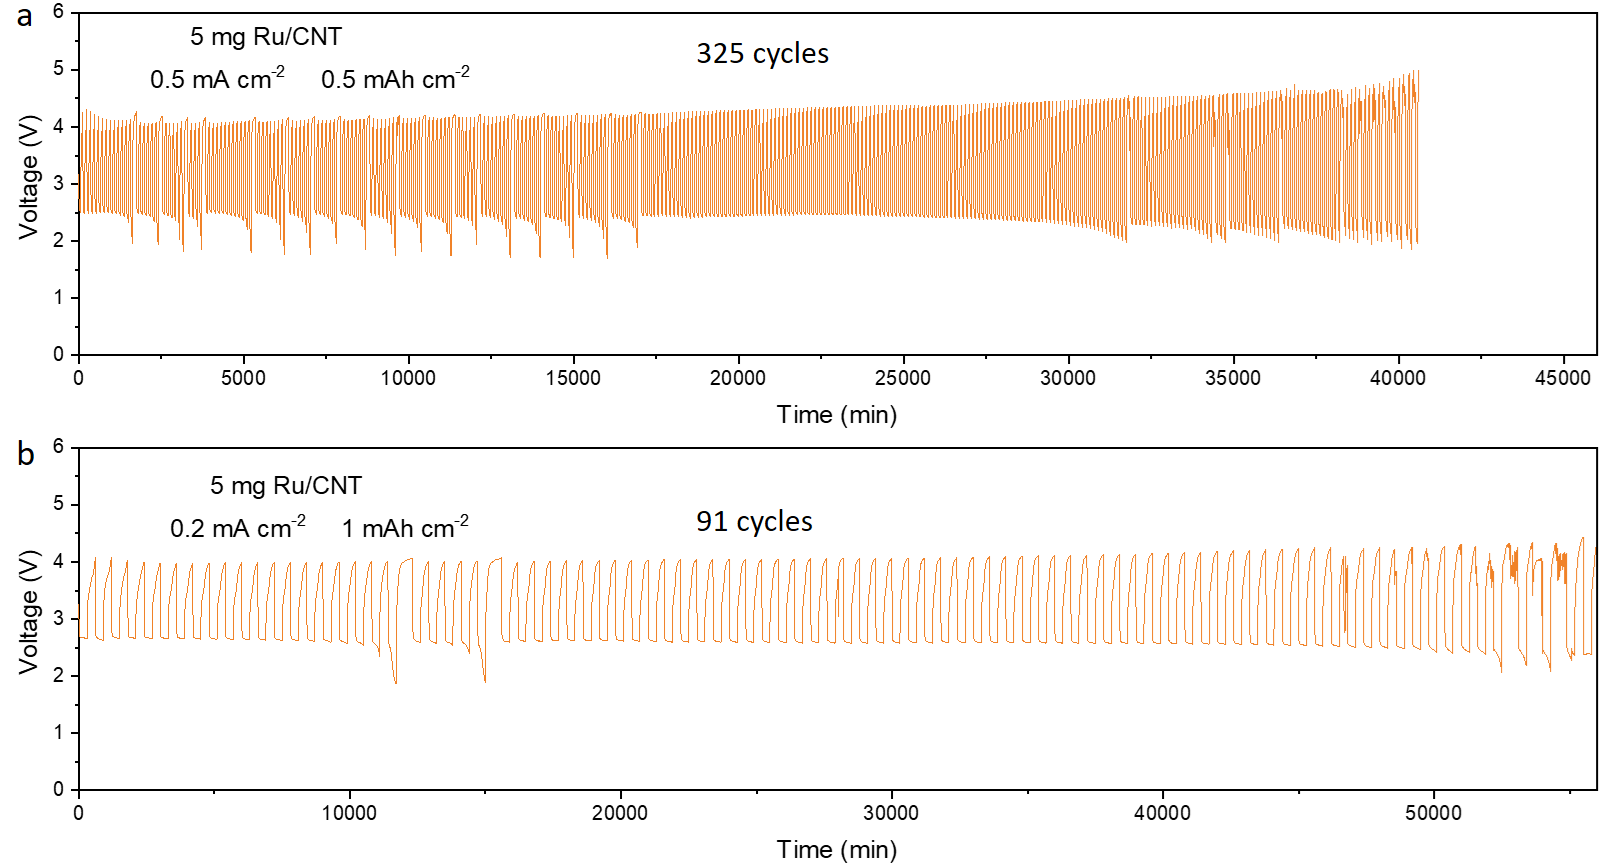


**Supplementary Figure 13.** Cycling performance of Li-O2 batteries with 5 mg cm-2 Ru/CNT cathodes.

**Supplementary Figure 14.** Cycling performance of a Li-O2 battery with super P cathode (0.4 mg) and a fixed capacity of 500 mAh g-1 at 250 mA g-1.


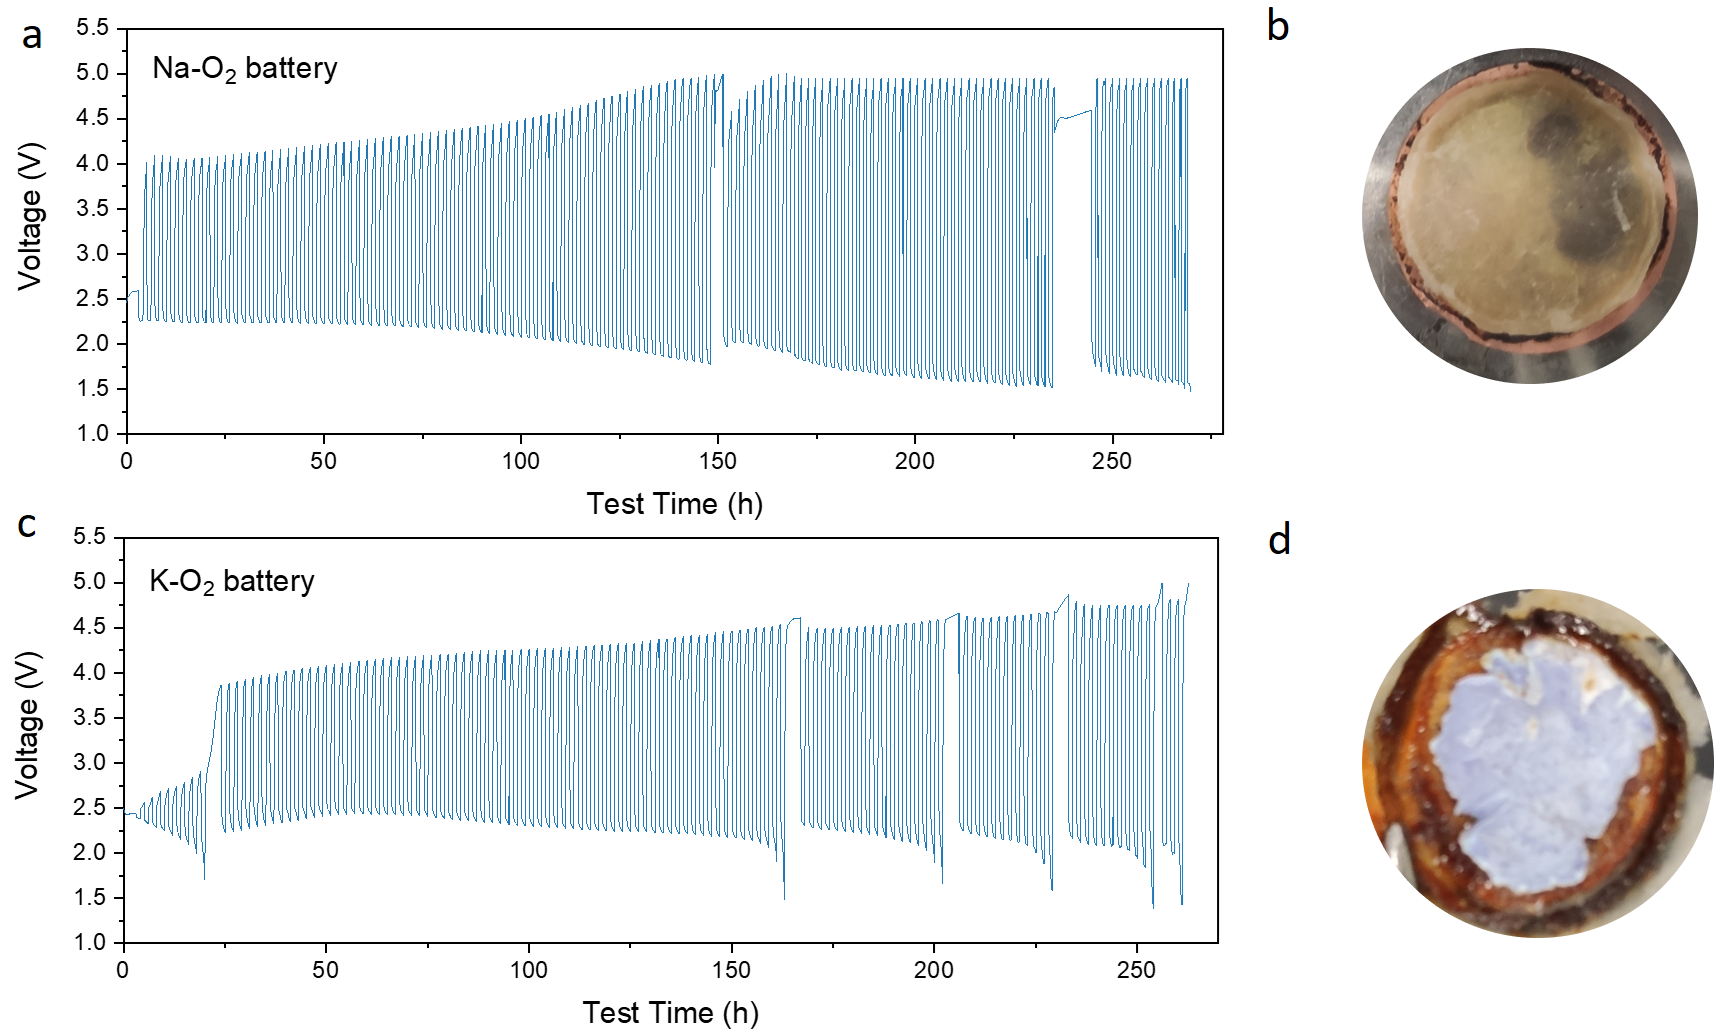


**Supplementary Figure 15.** Cycling performance of (a) a Na-O2 battery and (c) a K-O2 battery. The current density is 44.2 µA cm-2 and the capacity limitation is 44.2 µA cm-2. Optical pictures of the (b) front side of Na anode and (d) backside of K anode after cycling.

**Supplementary Table 1.** A comparison of performances of Li-O2 batteries with a high cathode loading or current density. Note: X μL indicates the amount of electrolyte was not given by the authors.

| Report | Electrolyte | Cathode mass loading | Current | Capacity | Cycle | Remark |
| --- | --- | --- | --- | --- | --- | --- |
| 1 | 100 mg molten salt + 1g LAGP | 0.2 g cm-2 Ni composite cathode | 0.2 mA cm-2 | 0.5 mAh cm-2 | 150 | 150 °C |
| 2 | 100 μL 50 mM TEMPO-COOH in 1 M LiTFSI/TEGDME | Bare P50 carbon paper | 0.1 mA cm−2 | 0.2 mAh cm−2 | 190 | Redox mediator (RM) in electrolyte |
| 3 | 1M LiOTf + 0.5 M NaOTf/TEGDME | Bare H23I6 carbon paper | 0.05 mA cm−2 | 0.5 mAh cm-2 | 30 | Na+ as RM |
| 4 | 20-μm-thick Ionic liquid-based gel polymer electrolyte | 3 mg cm-2 Ketjen black | 0.25 mA cm−2 | 2.5 mAh cm-2 | 20 |  |
| 5 | 10 μL 1M LiOTf /TEGDME + P(VDF-HFP) polymer electrolyte | 1 mg cm-2 CNT film | 0.4 mA cm−2 | 1 mAh cm-2 | 60 |  |
| 6 | 70 μL 1 M LiNO3/DMAc | 5 mg cm-2 glass carbon | 0.5 mA cm-2 | 1 mAh cm-2 | 120 | A seed layer on cathode |
| 7 | X μL 1 M LiNO3/DMA | 1.0 mg CNF/Pt−Au−Ru | 0.5 mA cm-2 | 5 mAh cm-2 | 6 |  |
| 8 | X μL 1 M LiNO3/DMSO | 0.8 mg MoSe2@CNT | 0.28 mA cm-2 | 0.56 mAh cm-2 | 100 |  |
| 9 | X μL 1.0 M LiTFSI/TEGDME | 1.5 mg NiCo2O4/graphene oxide aerogel | 0.1 mA cm−2 | 0.25 mAh cm-2 | 400 | A Li host is used. |
| 10 | X μL 1.0 M LiTFSI/TEGDME | 0.4 mg cm-2 NiCo2O4/CC | 0.2 mA cm−2 | 0.3 mAh cm−2 | 200 |  |
| 11 | 200 μL 1.0 M LiTFSI/TEGDME | 2 mg cm-2 TiC | 0.1 mA cm−2 | 0.5 mAh cm−2 | 100 |  |
| 12 | X μL LiTFSI (0.5 M), LiNO3 (0.5 M), and LiI (0.05 M) dissolved in TEGDME | 0.4 mg cm-2 MoC–Mo2C/NCNTs | 0.123 mA cm-2 | 0.2 mAh cm-2 | 164 |  |
| 13 | X μL 1.0 M LiTFSI/TEGDME | 0.8 mg cm-2 N-MoS2 | 0.08 mA cm-2 | 0.4 mAh cm-2 | 224 |  |
| 14 | X μL 1.0 M LiTFSI/TEGDME | 0.5 mg cm-2 Co@NC/PPC800 | 0.1 mA cm-2 | 0.5 mAh cm-2 | 136 |  |
| 15 | X μL 1.0 M LiTFSI/TEGDME | 0.56 mg cm-2 CoPt/AFC | 0.05 mA cm-2 | 0.2 mAh cm-2 | 156 |  |
| 16 | 180 μL 1.0 M LiTFSI/TEGDME | 0.6 mg cm-2 Co-SAs/N-C | 0.24 mA cm-2 | 0.6 mAh cm-2 | 260 |  |
| 17 | X μL 1.0 M LiTFSI/TEGDME | 1.0 mg cm-2 CNT@MoS2 | 0.5 mA cm-2 | 0.5 mAh cm-2 | 190 |  |
| This work | 130 μL 1 M LiFSI/TEGDME | 5 mg cm-2 Ru/CNT | 0.5 mA cm-2 | 0.5 mAh cm-2 | 325 | Without RM or host |
| 1 mA cm-2 | 0.2 mAh cm-2 | 900 |

**SUPPLEMENTARY REFERENCES**

1. Xia, C., Kwok, C.Y., and Nazar, L.F. (2018). A high-energy-density lithium-oxygen battery based on a reversible four-electron conversion to lithium oxide. Science *361*, 777-781.

2. Kim, J., Jung, G.Y., Hwang, C., Jeong, J., Baek, K., Lee, J., Kang, S.J., Kwak, S.K., and Song, H.-K. (2021). A dismutase-biomimetic bifunctional mobile catalyst for anti-aging lithium–oxygen batteries. J. Power Sources *492*, 229633.

3. Bi, X., Li, M., Liu, C., Yuan, Y., Wang, H., Key, B., Wang, R., Shahbazian-Yassar, R., Curtiss, L.A., Lu, J., et al. (2020). Cation Additive Enabled Rechargeable LiOH-Based Lithium-Oxygen Batteries. Angew. Chem. Int. Ed. *59*, 22978-22982.

4. Woo, H.-S., Son, H., Min, J.-Y., Rhee, J., Lee, H.-T., and Kim, D.-W. (2020). Ionic liquid-based gel polymer electrolyte containing zwitterion for lithium-oxygen batteries. Electrochim. Acta *345*, 136248.

5. Yu, W., Xue, C., Hu, B., Xu, B., Li, L., and Nan, C.-W. (2020). Oxygen- and dendrite-resistant ultra-dry polymer electrolytes for solid-state Li–O2 batteries. Energy Storage Mater. *27*, 244-251.

6. Oh, G., Seo, S., Kim, W., Cho, Y., Kwon, H., Kim, S., Noh, S., Kwon, E., Oh, Y., Song, J., et al. (2021). Seed Layer Formation on Carbon Electrodes to Control Li2O2 Discharge Products for Practical Li-O2 Batteries with High Energy Density and Reversibility. ACS Appl. Mater. Interfaces *13*, 13200-13211.

7. Jung, W.-B., Park, H., Jang, J.-S., Kim, D.Y., Kim, D.W., Lim, E., Kim, J.Y., Cho, S., Suk, J., Kang, Y., et al. (2021). Polyelemental Nanoparticles as Catalysts for a Li–O2 Battery. ACS Nano *15*, 4235-4244.

8. He, B., Li, G., Li, J., Wang, J., Tong, H., Fan, Y., Wang, W., Sun, S., and Dang, F. (2021). MoSe2@CNT Core–Shell Nanostructures as Grain Promoters Featuring a Direct Li2O2 Formation/Decomposition Catalytic Capability in Lithium‐Oxygen Batteries. Adv. Energy Mater. *11*, 229633.

9. Ma, Y., Wei, L., Gu, Y., Hu, J., Chen, Y., Qi, P., Zhao, X., Peng, Y., Deng, Z., and Liu, Z. (2020). High-Performance Li-O2 Batteries Based on All-Graphene Backbone. Adv. Funct. Mater. *30*, 2007218.

10. Song, K., Yang, B., Li, Z., Lv, Y., Yu, Y., Yuan, L., Shen, X., and Hu, X. (2020). Direct synthesis of ACo2O4 (A = Ni, Cu, Fe, Zn) nanowires on carbon cloth as an oxygen electrode catalyst for rechargeable lithium-oxygen batteries. Appl. Surf. Sci. *529*, 147064.

11. Jeong, M.-G., Kwak, W.-J., Shin, H.-J., Sun, Y.-K., and Jung, H.-G. (2020). Perpendicularly aligned TiC-coated carbon cloth cathode for high-performance Li-O2 batteries. Chem. Eng. J. *399*, 125699.

12. Oh, Y.J., Kim, J.H., Lee, J.Y., Park, S.-K., and Kang, Y.C. (2020). Design of house centipede-like MoC–Mo2C nanorods grafted with N-doped carbon nanotubes as bifunctional catalysts for high-performance Li–O2 batteries. Chem. Eng. J. *384*, 123344.

13. Fan, X., Huang, Y., Wang, H., Zheng, F., Tan, C., Li, Y., Lu, X., Ma, Z., and Li, Q. (2021). Efficacious nitrogen introduction into MoS2 as bifunctional electrocatalysts for long-life Li-O2 batteries. Electrochim. Acta *369*, 137653.

14. Liang, H., Jia, L., and Chen, F. (2020). Three-dimensional self-standing Co@NC octahedron/biochar cathode for non-aqueous Li-O2 batteries: efficient catalysis for reversible formation and decomposition of LiOH. J. Mater. Sci. *55*, 7792-7804.

15. Xia, H., Xie, Q., Tian, Y., Chen, Q., Wen, M., Zhang, J., Wang, Y., Tang, Y., and Zhang, S. (2021). High-efficient CoPt/activated functional carbon catalyst for Li-O2 batteries. Nano Energy *84*, 105877.

16. Wang, P., Ren, Y., Wang, R., Zhang, P., Ding, M., Li, C., Zhao, D., Qian, Z., Zhang, Z., Zhang, L., et al. (2020). Atomically dispersed cobalt catalyst anchored on nitrogen-doped carbon nanosheets for lithium-oxygen batteries. Nat. Commun. *11*, 1576.

17. Song, M., Tan, H., Li, X., Tok, A.I.Y., Liang, P., Chao, D., and Fan, H.J. (2019). Atomic‐Layer‐Deposited Amorphous MoS2 for Durable and Flexible Li–O2 Batteries. Small Methods *4*, 1900274.
